# Supplementary material
Source: Springer Nature journal article supplement (https://www.springermedizin.de/resource/supplementary/12911_2013_692_MOESM1_ESM.pdf/9526434)
Supplement: MOESM1 [file 9526434]

| Initial questions                                                                                                                                             | Follow-up questions                                                                                  | Symptom characterization                                                         | KPS %                                                                                          | Comments                                                                   |                                                                              |
|---------------------------------------------------------------------------------------------------------------------------------------------------------------|------------------------------------------------------------------------------------------------------|----------------------------------------------------------------------------------|------------------------------------------------------------------------------------------------|----------------------------------------------------------------------------|------------------------------------------------------------------------------|
| Is the patient able to carry on with his/her normal work or activity?<br><br>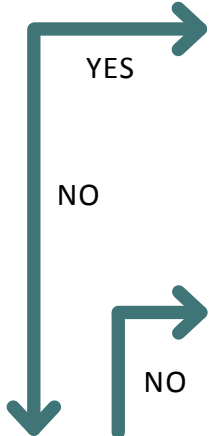 | <b>A</b> Does the patient have symptoms? (pain, loss or gain of weight, reduced energy etc.)         | No symptoms.                                                                     | <b>100</b>                                                                                     | Normal, no complaints, no evidence of disease.                             |                                                                              |
|                                                                                                                                                               |                                                                                                      | Mild symptoms.                                                                   | <b>90</b>                                                                                      | Able to carry on normal activity, minor signs or symptoms of disease.      |                                                                              |
|                                                                                                                                                               |                                                                                                      | Moderate symptoms.                                                               | <b>80</b>                                                                                      | Normal activity with effort, some signs or symptoms of disease.            |                                                                              |
| Is the patient bedridden for more than half a day?<br><br>                   | <b>B</b> Does the patient need assistance? (grooming, food intake, dressing, other daily activities) | No assistance.                                                                   | <b>70</b>                                                                                      | Cares for self, unable to carry on normal activity or to do active work.   |                                                                              |
|                                                                                                                                                               |                                                                                                      | Occasional assistance.                                                           | <b>60</b>                                                                                      | Requires occasional assistance, but is able to care for most of his needs. |                                                                              |
|                                                                                                                                                               |                                                                                                      | Considerable assistance.                                                         | <b>50</b>                                                                                      | Requires considerable assistance and frequent medical care.                |                                                                              |
|                                                                                                                                                               |                                                                                                      | <b>C</b> What is the patient's degree of disability in terms of bed confinement? | Bedridden in more than 50 % of the time.                                                       | <b>40</b>                                                                  | Disabled, requires special care and assistance.                              |
|                                                                                                                                                               |                                                                                                      |                                                                                  | Almost completely bedridden.                                                                   | <b>30</b>                                                                  | Severely disabled, hospitalization is indicated although death not imminent. |
|                                                                                                                                                               |                                                                                                      |                                                                                  | Completely bedridden and dependent upon extensive nursing care by professionals and/or family. | <b>20</b>                                                                  | Hospitalization necessary, very sick, active supportive treatment necessary. |
| Completely bedridden <i>and</i> comatose or barely arousable.                                                                                                 | <b>10</b>                                                                                            | Moribund, fatal processes progressing rapidly.                                   |                                                                                                |                                                                            |                                                                              |
| Dead.                                                                                                                                                         | <b>0</b>                                                                                             | Dead.                                                                            |                                                                                                |                                                                            |                                                                              |
